# Supplementary material for: Adverse employment histories and allostatic load: associations over the working life
Source: HighWire-hosted journal article supplement (doi:10.1136/jech-2021-217607), 2021-10-08
Supplement: jech-2021-217607supp001_data_supplement.pdf [file jech-2021-217607supp001_data_supplement.pdf]

Supplementary material

Table S1: List of used biological markers for AL-Index.

| Biological System                   | Biomarker                               | Unit                                        | Computation and transformation                                                                                                     | Application                                                                                                                                                               | High-risk quartile? |
|-------------------------------------|-----------------------------------------|---------------------------------------------|------------------------------------------------------------------------------------------------------------------------------------|---------------------------------------------------------------------------------------------------------------------------------------------------------------------------|---------------------|
| Cardiovascular and pulmonary system | Systolic blood pressure (SBP)           | mmHg                                        |                                                                                                                                    | Indices of cardiovascular activity and major risk factor for vascular disease                                                                                             | Upper               |
|                                     | Diastolic blood pressure (DBP)          | mmHg                                        |                                                                                                                                    |                                                                                                                                                                           | Upper               |
|                                     | ratio of FEV to FVC                     | (FEV) in one second / FVC                   | Tiffeneau-Pinelli index                                                                                                            | Indicator of lung function                                                                                                                                                | Lower               |
| Anthropometric system               | Waist to hip ratio                      | waist measurement (cm) hip measurement (cm) | Waist (cm)/ hip (cm)                                                                                                               | Body fat distribution and a predictor of metabolic consequences independent of overall adiposity                                                                          | Upper               |
| Metabolic System                    | Blood sugar level (fasting glucose, FG) | mmol/l                                      |                                                                                                                                    | Main source of energy / indicates Diabetes                                                                                                                                | Upper               |
|                                     | Total cholesterol to HDL ratio          |                                             | Total cholesterol (mmol/l)/HDL cholesterol (mmol/l)                                                                                | “Fat in the blood” associated with heart disease                                                                                                                          | Upper               |
|                                     | triglycerides (TG)                      | mmol/l                                      |                                                                                                                                    | Important source of energy, high levels indicate cardiovascular risk                                                                                                      | Upper               |
|                                     | low density lipoproteins (LDL)          | mmol/l                                      | Friedewald equation: LDL = TC - HDL - (TG / 2.2)                                                                                   | “Bad cholesterol,” transports cholesterol to tissues, low levels associated with better cardiovascular health                                                             | Upper               |
|                                     | Creatinine clearance Rate               | Creatinine(μmol/l)                          | Cockcroft-Gault formula [140-age (years)] x weight (kg) x f/ serum creatinine (mmol/l) where f=1.23 for males and 1.04 for females | Chemical waste product that indicates how effectively the kidneys are “cleaning” the blood.                                                                               | Lower               |
| Immune and inflammatory system      | White blood cells (WBC) count           | Counts (cel 10^9/l)                         |                                                                                                                                    | Indicates immune system activity / Elevated WBC also associated with increased risk of coronary heart disease, ischemic stroke, and mortality form cardiovascular disease | Upper               |

Table S2. Pairwise correlations of all allostatic load biomarkers for men (lower left triangle) and women (upper right triangle).

|           | SBP    | DBP    | FEV1/<br>FVC | WHR    | FC    | TC/<br>HDL | TG    | LDL    | CCR   | WBC    |
|-----------|--------|--------|--------------|--------|-------|------------|-------|--------|-------|--------|
| SBP       | 1.000  | 0.116  | 0.119        | -0.013 | 0.195 | 0.044      | 0.061 | -0.021 | 0.133 | 0.158  |
| DBP       | 0.097  | 1.000  | 0.163        | 0.049  | 0.278 | 0.210      | 0.152 | 0.034  | 0.275 | 0.180  |
| FEV1/ FVC | 0.108  | 0.096  | 1.000        | 0.591  | 0.457 | 0.094      | 0.120 | 0.124  | 0.233 | 0.171  |
| WHR       | -0.022 | -0.082 | 0.510        | 1.000  | 0.222 | 0.125      | 0.095 | 0.028  | 0.129 | -0.031 |
| FC        | 0.148  | 0.204  | 0.458        | 0.024  | 1.000 | 0.192      | 0.175 | 0.015  | 0.358 | 0.179  |
| TC/HDL    | 0.074  | 0.192  | 0.054        | 0.045  | 0.119 | 1.000      | 0.702 | -0.017 | 0.187 | 0.031  |
| TG        | 0.064  | 0.120  | 0.124        | 0.096  | 0.141 | 0.685      | 1.000 | 0.031  | 0.162 | 0.161  |
| LDL       | -0.059 | 0.007  | 0.102        | 0.043  | 0.007 | -0.033     | 0.016 | 1.000  | 0.021 | 0.097  |
| CCR       | 0.183  | 0.289  | 0.198        | -0.018 | 0.276 | 0.245      | 0.204 | -0.015 | 1.000 | 0.241  |
| WBC       | 0.079  | 0.157  | 0.153        | 0.003  | 0.166 | 0.026      | 0.119 | 0.081  | 0.261 | 1.000  |

Note. SBP: Systolic blood pressure, DBP: Diastolic blood pressure, FEV1/FVC: Ratio of FEV to FVC, WHR: Waist to hip ratio, FC: Fasting glucose, TC/HDL: Total cholesterol to HDL ratio, TG: Triglycerides, LDL: low density lipoproteins, CCR: Creatinine clearance Rate, WBC: White blood cells counts.

Table S3. Association between career characteristics and AL-Index for men and women:  
Negative binomial regression coefficients (β), confidence intervals, and p-values (additional adjustments for BMI and activity limitations)

|                                            |                                                           | Women (n=43,890) |                |         |          | Men (n=41,561) |                |         |          |
|--------------------------------------------|-----------------------------------------------------------|------------------|----------------|---------|----------|----------------|----------------|---------|----------|
|                                            |                                                           | β                | CI (95%)       | p-value | [AME]    | β              | CI (95%)       | p-value | [AME]    |
| Temporary jobs (per 10 years in paid work) | No temporary job (ref.)                                   | –                |                |         |          | –              |                |         |          |
|                                            | 1 or less temporary job                                   | -0.003           | (-0.024,0.017) | 0.737   | [-0.008] | 0.014          | (-0.007,0.036) | 0.196   | [0.035]  |
|                                            | More than 1 temporary jobs                                | 0.034            | (0.003,0.065)  | 0.031   | [0.082]  | 0.044          | (-0.007,0.094) | 0.090   | [0.107]  |
| Job changes (per 10 years in paid work)    | No change (ref.)                                          | –                |                |         |          | –              |                |         |          |
|                                            | 2 or less changes                                         | 0.001            | (-0.012,0.015) | 0.841   | [0.003]  | 0.001          | (-0.013,0.015) | 0.867   | [0.003]  |
|                                            | More than 2 changes                                       | 0.001            | (-0.020,0.021) | 0.945   | [0.002]  | 0.006          | (-0.018,0.029) | 0.636   | [0.014]  |
| Number of unemployment periods             | No unemployment period (ref.)                             | –                |                |         |          | –              |                |         |          |
|                                            | 1 unemployment period                                     | 0.009            | (-0.011,0.029) | 0.354   | [0.023]  | 0.011          | (-0.013,0.035) | 0.367   | [0.026]  |
|                                            | 2+ unemployment periods                                   | 0.039            | (0.001,0.077)  | 0.042   | [0.095]  | 0.056          | (0.009,0.102)  | 0.018   | [0.137]  |
| Years out of work                          | No years out of work (ref.)                               | –                |                |         |          | –              |                |         |          |
|                                            | 1-5 years out of work                                     | 0.006            | (-0.010,0.022) | 0.445   | [0.014]  | 0.000          | (-0.016,0.016) | 0.999   | [0.000]  |
|                                            | 6+ years out of work                                      | 0.038            | (0.023,0.054)  | <0.001  | [0.092]  | 0.057          | (0.033,0.080)  | <0.001  | [0.139]  |
| Mode occupational position                 | Large employers, higher managers and professionals (ref.) | –                |                |         |          | –              |                |         |          |
|                                            | Lower managers and professionals                          | 0.051            | (0.024,0.078)  | <0.001  | [0.118]  | 0.028          | (0.006,0.050)  | 0.014   | [0.065]  |
|                                            | Intermediate employee                                     | 0.060            | (0.031,0.089)  | <0.001  | [0.139]  | 0.050          | (0.025,0.075)  | <0.001  | [0.118]  |
|                                            | Small employers and self-employed                         | 0.070            | (0.016,0.125)  | 0.012   | [0.164]  | 0.064          | (0.021,0.106)  | 0.003   | [0.151]  |
|                                            | Lower grade white collar workers                          | 0.113            | (0.079,0.147)  | <0.001  | [0.269]  | 0.075          | (0.031,0.119)  | 0.001   | [0.178]  |
|                                            | Skilled workers                                           | 0.065            | (0.009,0.120)  | 0.022   | [0.151]  | 0.082          | (0.054,0.109)  | <0.001  | [0.195]  |
|                                            | Semi- or unskilled workers                                | 0.101            | (0.060,0.143)  | <0.001  | [0.240]  | 0.103          | (0.071,0.134)  | <0.001  | [0.248]  |
|                                            | Main position unknown                                     | 0.069            | (0.039,0.098)  | <0.001  | [0.160]  | 0.050          | (0.028,0.073)  | <0.001  | [0.118]  |
| Lack of promotion                          | Promotion (ref.)                                          | –                |                |         |          | –              |                |         |          |
|                                            | No promotion                                              | 0.004            | (-0.014,0.022) | 0.679   | [0.009]  | -0.010         | (-0.026,0.006) | 0.226   | [-0.024] |
|                                            | Failed promotion                                          | -0.004           | (-0.050,0.042) | 0.851   | [-0.010] | 0.043          | (0.006,0.079)  | 0.022   | [0.105]  |

Note. Models are based on multilevel models (individuals nested in health examination centre) and calculated separately for each career characteristic, adjusted for age, age square, partnership situation, education, BMI (continuous) and activity limitations (binary indicator). Respondents who retired or had a health-related career interruption prior age 45 are excluded from the analyses.

Table S4: Association between career characteristics and allostatic load biomarkers for women:  
unstandardized regression coefficients (b) and confidence intervals

|                                                           | SBP (n=45,234) |                |         | DBP (n=45,234) |                |         | FEV1/FVC (n=33,422) |                 |         | WHR (n=46,100) |                |         | FG (n=44,889) |                |         | TC/HDL (n=44,318) |                |         | TG (n=44,823) |                |         | LDL (n=44,280) |                 |         | CCR (n=44,844) |                |         | WBC (n=45,681) |                |         |
|-----------------------------------------------------------|----------------|----------------|---------|----------------|----------------|---------|---------------------|-----------------|---------|----------------|----------------|---------|---------------|----------------|---------|-------------------|----------------|---------|---------------|----------------|---------|----------------|-----------------|---------|----------------|----------------|---------|----------------|----------------|---------|
|                                                           | b              | CI (95%)       | p-value | b              | CI (95%)       | p-value | b                   | CI (95%)        | p-value | b              | CI (95%)       | p-value | b             | CI (95%)       | p-value | b                 | CI (95%)       | p-value | b             | CI (95%)       | p-value | b              | CI (95%)        | p-value | b              | CI (95%)       | p-value | b              | CI (95%)       | p-value |
| No temporary job (ref.)                                   | –              |                |         | –              |                |         | –                   |                 |         | –              |                |         | –             |                |         | –                 |                |         | –             |                |         | –              |                 |         | –              |                |         | –              |                |         |
| 1 or less temporary job (per 10 years in paid work)       | 0.012          | (-0.015,0.040) | 0.385   | 0.025          | (-0.001,0.052) | 0.064   | -0.017              | (-0.047,0.013)  | 0.281   | 0.015          | (-0.006,0.036) | 0.157   | 0.007         | (-0.019,0.032) | 0.600   | 0.011             | (-0.011,0.033) | 0.319   | 0.010         | (-0.014,0.035) | 0.418   | -0.016         | (-0.042,0.010)  | 0.231   | 0.009          | (-0.012,0.029) | 0.410   | 0.010          | (-0.018,0.037) | 0.493   |
| more than 1 temporary job (per 10 years in paid work)     | 0.059          | (0.016,0.102)  | 0.007   | 0.043          | (0.002,0.085)  | 0.041   | -0.026              | (-0.074,0.021)  | 0.194   | 0.065          | (0.032,0.098)  | 0.000   | 0.029         | (-0.010,0.069) | 0.149   | 0.051             | (0.017,0.085)  | 0.004   | 0.080         | (0.043,0.118)  | <0.001  | -0.026         | (-0.066,0.014)  | 0.206   | 0.066          | (0.034,0.098)  | 0.000   | -0.012         | (-0.055,0.031) | 0.580   |
| No job change (ref.)                                      | –              |                |         | –              |                |         | –                   |                 |         | –              |                |         | –             |                |         | –                 |                |         | –             |                |         | –              |                 |         | –              |                |         | –              |                |         |
| 2 or less job changes (per 10 years in paid work)         | 0.004          | (-0.016,0.024) | 0.681   | 0.008          | (-0.011,0.027) | 0.415   | -0.006              | (-0.028,0.016)  | 0.575   | 0.003          | (-0.012,0.018) | 0.707   | <0.001        | (-0.018,0.019) | 0.985   | 0.009             | (-0.007,0.025) | 0.262   | 0.001         | (-0.016,0.019) | 0.891   | 0.004          | (-0.015,0.023)  | 0.682   | 0.011          | (-0.004,0.026) | 0.142   | 0.003          | (-0.017,0.022) | 0.792   |
| more than 2 job changes (per 10 years in paid work)       | -0.005         | (-0.034,0.024) | 0.731   | 0.021          | (-0.006,0.049) | 0.129   | -0.021              | (-0.053,0.010)  | 0.180   | 0.039          | (0.017,0.061)  | 0.000   | 0.022         | (-0.005,0.048) | 0.107   | 0.033             | (0.010,0.056)  | 0.004   | 0.035         | (0.010,0.060)  | 0.007   | 0.011          | (-0.015,0.038)  | 0.408   | 0.038          | (0.016,0.059)  | 0.001   | 0.003          | (-0.025,0.031) | 0.830   |
| No unemployment period (ref.)                             | –              |                |         | –              |                |         | –                   |                 |         | –              |                |         | –             |                |         | –                 |                |         | –             |                |         | –              |                 |         | –              |                |         | –              |                |         |
| 1 unemployment period                                     | -0.015         | (-0.044,0.013) | 0.291   | -0.005         | (-0.032,0.022) | 0.722   | -0.037              | (-0.069,-0.006) | 0.019   | 0.031          | (0.010,0.053)  | 0.005   | 0.034         | (0.008,0.061)  | 0.010   | 0.035             | (0.012,0.058)  | 0.002   | 0.046         | (0.021,0.071)  | <0.001  | 0.005          | (-0.022,0.032)  | 0.718   | 0.036          | (0.015,0.058)  | 0.001   | 0.039          | (0.011,0.067)  | 0.006   |
| 2+ unemployment periods                                   | 0.020          | (-0.034,0.074) | 0.461   | 0.052          | (0.001,0.104)  | 0.047   | -0.076              | (-0.134,-0.018) | 0.010   | 0.076          | (0.035,0.116)  | <0.001  | 0.053         | (0.004,0.103)  | 0.036   | 0.074             | (0.031,0.117)  | 0.001   | 0.116         | (0.068,0.163)  | <0.001  | 0.010          | (-0.040,0.060)  | 0.699   | 0.045          | (0.005,0.085)  | 0.028   | 0.066          | (0.013,0.119)  | 0.015   |
| No years out of work (ref.)                               | –              |                |         | –              |                |         | –                   |                 |         | –              |                |         | –             |                |         | –                 |                |         | –             |                |         | –              |                 |         | –              |                |         | –              |                |         |
| 1-5 years out of work                                     | -0.010         | (-0.032,0.012) | 0.375   | -0.001         | (-0.023,0.020) | 0.898   | -0.023              | (-0.047,0.002)  | 0.069   | 0.022          | (0.005,0.039)  | 0.010   | 0.007         | (-0.013,0.028) | 0.474   | 0.015             | (-0.003,0.032) | 0.104   | 0.023         | (0.004,0.043)  | 0.018   | -0.010         | (-0.031,0.010)  | 0.332   | 0.024          | (0.008,0.041)  | 0.004   | 0.014          | (-0.008,0.035) | 0.219   |
| 6+ years out of work                                      | 0.017          | (-0.006,0.039) | 0.140   | 0.023          | (0.002,0.045)  | 0.032   | -0.052              | (-0.077,-0.028) | <0.001  | 0.072          | (0.055,0.089)  | <0.001  | 0.046         | (0.026,0.067)  | <0.001  | 0.051             | (0.033,0.069)  | <0.001  | 0.080         | (0.061,0.100)  | <0.001  | -0.003         | (-0.024,0.018)  | 0.801   | 0.062          | (0.046,0.079)  | <0.001  | 0.019          | (-0.003,0.041) | 0.089   |
| Large employers, higher managers and professionals (ref.) | –              |                |         | –              |                |         | –                   |                 |         | –              |                |         | –             |                |         | –                 |                |         | –             |                |         | –              |                 |         | –              |                |         | –              |                |         |
| Lower managers and professionals                          | 0.057          | (0.022,0.093)  | 0.002   | 0.053          | (0.018,0.087)  | 0.003   | -0.009              | (-0.049,0.030)  | 0.645   | 0.039          | (0.012,0.066)  | 0.005   | 0.008         | (-0.024,0.041) | 0.617   | 0.049             | (0.021,0.078)  | 0.001   | 0.075         | (0.043,0.106)  | <0.001  | 0.043          | (0.010,0.077)   | 0.011   | 0.032          | (0.006,0.059)  | 0.016   | 0.029          | (-0.016,0.055) | 0.275   |
| Intermediate employee                                     | 0.075          | (0.036,0.114)  | <0.001  | 0.063          | (0.025,0.101)  | 0.001   | 0.002               | (-0.041,0.046)  | 0.919   | 0.083          | (0.053,0.113)  | <0.001  | 0.040         | (0.004,0.076)  | 0.031   | 0.080             | (0.048,0.111)  | <0.001  | 0.124         | (0.089,0.159)  | <0.001  | 0.050          | (0.013,0.087)   | 0.008   | 0.067          | (0.038,0.096)  | <0.001  | 0.031          | (-0.007,0.070) | 0.113   |
| Small employers and self-employed                         | 0.033          | (-0.047,0.114) | 0.417   | 0.023          | (-0.054,0.101) | 0.553   | 0.031               | (-0.059,0.122)  | 0.497   | 0.143          | (0.082,0.204)  | <0.001  | 0.091         | (0.018,0.165)  | 0.015   | 0.138             | (0.074,0.202)  | <0.001  | 0.151         | (0.080,0.221)  | <0.001  | 0.105          | (0.036,0.180)   | 0.006   | 0.057          | (-0.003,0.117) | 0.063   | 0.091          | (0.012,0.171)  | 0.024   |
| Lower grade white collar workers                          | 0.171          | (0.123,0.219)  | <0.001  | 0.161          | (0.114,0.207)  | <0.001  | -0.008              | (-0.061,0.046)  | 0.773   | 0.389          | (0.153,0.236)  | <0.001  | 0.115         | (0.071,0.159)  | <0.001  | 0.132             | (0.095,0.170)  | <0.001  | 0.197         | (0.154,0.239)  | <0.001  | 0.075          | (0.030,0.121)   | 0.001   | 0.190          | (0.154,0.226)  | <0.001  | 0.125          | (0.078,0.172)  | <0.001  |
| Skilled workers                                           | 0.163          | (0.083,0.244)  | <0.001  | 0.118          | (0.041,0.195)  | 0.003   | 0.039               | (-0.048,0.126)  | 0.381   | 0.110          | (0.049,0.171)  | <0.001  | 0.128         | (0.055,0.202)  | 0.001   | 0.023             | (-0.041,0.087) | 0.486   | 0.108         | (0.037,0.179)  | 0.003   | -0.007         | (-0.082,0.069)  | 0.862   | 0.089          | (0.029,0.148)  | 0.003   | 0.083          | (0.004,0.161)  | 0.040   |
| Semi- or unskilled workers                                | 0.190          | (0.130,0.251)  | <0.001  | 0.147          | (0.089,0.205)  | <0.001  | 0.035               | (-0.035,0.104)  | 0.327   | 0.246          | (0.200,0.292)  | <0.001  | 0.146         | (0.091,0.202)  | <0.001  | 0.177             | (0.128,0.225)  | <0.001  | 0.218         | (0.164,0.271)  | <0.001  | 0.044          | (-0.013,0.101)  | 0.132   | 0.214          | (0.169,0.259)  | <0.001  | 0.112          | (0.051,0.172)  | <0.001  |
| Main position unknown                                     | 0.075          | (0.035,0.115)  | <0.001  | 0.063          | (0.024,0.101)  | 0.001   | -0.024              | (-0.068,0.021)  | 0.298   | 0.097          | (0.066,0.127)  | <0.001  | 0.056         | (0.019,0.093)  | 0.003   | 0.091             | (0.059,0.123)  | <0.001  | 0.134         | (0.099,0.169)  | <0.001  | 0.054          | (0.016,0.091)   | 0.005   | 0.078          | (0.049,0.108)  | <0.001  | 0.054          | (0.015,0.094)  | 0.007   |
| Promotion (ref.)                                          | –              |                |         | –              |                |         | –                   |                 |         | –              |                |         | –             |                |         | –                 |                |         | –             |                |         | –              |                 |         | –              |                |         | –              |                |         |
| No promotion                                              | 0.018          | (-0.007,0.043) | 0.154   | 0.006          | (-0.018,0.030) | 0.609   | 0.003               | (-0.025,0.030)  | 0.848   | 0.006          | (-0.013,0.025) | 0.539   | 0.006         | (-0.017,0.029) | 0.628   | -0.017            | (-0.037,0.003) | 0.104   | -0.002        | (-0.025,0.020) | 0.831   | -0.024         | (-0.048,-0.001) | 0.046   | -0.012         | (-0.030,0.007) | 0.215   | -0.005         | (-0.030,0.020) | 0.682   |
| Failed promotion                                          | 0.035          | (-0.029,0.098) | 0.283   | 0.046          | (-0.015,0.108) | 0.137   | 0.029               | (-0.041,0.098)  | 0.418   | 0.008          | (-0.040,0.056) | 0.749   | -0.018        | (-0.076,0.040) | 0.538   | -0.024            | (-0.074,0.027) | 0.353   | -0.018        | (-0.073,0.038) | 0.533   | 0.011          | (-0.048,0.071)  | 0.706   | 0.016          | (-0.031,0.064) | 0.492   | -0.016         | (-0.079,0.046) | 0.607   |

Note. Models are based on linear multilevel models (individuals nested in health examination center) and calculated separately for each career characteristic, adjusted for age, age square, partnership situation and education (complete case analyses). Respondents who retired or had a health-related career interruption prior age 45 are excluded from the analyses. Each outcome was log-transformed in case of skewness (i.e. white blood cell counts, blood sugar levels, ratio of total to HDL cholesterol, triglycerides, and lung function) and standardized to enable comparisons before estimating models. Coefficients estimate the differences on the standardized scale to the reference category. The sample varies according to the outcome, because valid data for some medical examination data (i.e. lung function) is available for a lower proportion of participants than data from blood samples.

SBP: Systolic blood pressure, DBP: Diastolic blood pressure, FEV1/FVC: Ratio of FEV to FVC, WHR: Waist to hip ratio, FG: Fasting glucose, TC/HDL: Total cholesterol to HDL ratio, TG: Triglycerides, LDL: low density lipoproteins, CCR: Creatinine clearance Rate, WBC: White blood cells counts.

Table S5: Association between career characteristics and allostatic load biomarkers for men: unstandardized regression coefficients (b) and confidence intervals

|                                                           | SBP (n=42,852) |                 |         | DBP (n=42,852) |                 |         | FEV1/FVC (n=31,993) |                 |         | WHR (n=43,569) |                 |         | FG (n=42,224) |                 |         | TC/HDL (n=41,350) |                 |         | TG (n=42,115) |                 |         | LDL (n=41,283) |                 |         | CCR (n=42,309) |                 |         | WBC (n=42,999) |                |         |
|-----------------------------------------------------------|----------------|-----------------|---------|----------------|-----------------|---------|---------------------|-----------------|---------|----------------|-----------------|---------|---------------|-----------------|---------|-------------------|-----------------|---------|---------------|-----------------|---------|----------------|-----------------|---------|----------------|-----------------|---------|----------------|----------------|---------|
|                                                           | b              | CI (95%)        | p-value | b              | CI (95%)        | p-value | b                   | CI (95%)        | p-value | b              | CI (95%)        | p-value | b             | CI (95%)        | p-value | b                 | CI (95%)        | p-value | b             | CI (95%)        | p-value | b              | CI (95%)        | p-value | b              | CI (95%)        | p-value | b              | CI (95%)       | p-value |
| No temporary job (ref.)                                   | -              | -               | -       | -              | -               | -       | -                   | -               | -       | -              | -               | -       | -             | -               | -       | -                 | -               | -       | -             | -               | -       | -              | -               | -       | -              | -               | -       | -              | -              | -       |
| 1 or less temporary job (per 10 years in paid work)       | -0.037         | (-0.066,-0.008) | 0.013   | -0.034         | (-0.064,-0.004) | 0.025   | -0.058              | (-0.094,-0.023) | 0.001   | -0.007         | (-0.028,0.015)  | 0.545   | -0.042        | (-0.076,-0.008) | 0.016   | 0.013             | (-0.013,0.040)  | 0.336   | 0.002         | (-0.030,0.033)  | 0.924   | 0.010          | (-0.020,0.040)  | 0.521   | -0.032         | (-0.056,-0.008) | 0.008   | 0.021          | (-0.008,0.051) | 0.160   |
| more than 1 temporary job (per 10 years in paid work)     | -0.049         | (-0.116,0.018)  | 0.154   | -0.026         | (-0.094,0.042)  | 0.456   | -0.079              | (-0.165,0.006)  | 0.068   | 0.010          | (-0.039,0.060)  | 0.689   | -0.011        | (-0.090,0.068)  | 0.785   | 0.071             | (0.009,0.132)   | 0.024   | 0.082         | (0.008,0.156)   | 0.030   | -0.055         | (-0.125,0.015)  | 0.122   | 0.001          | (-0.054,0.055)  | 0.981   | 0.048          | (-0.021,0.117) | 0.171   |
| No job change (ref.)                                      | -              | -               | -       | -              | -               | -       | -                   | -               | -       | -              | -               | -       | -             | -               | -       | -                 | -               | -       | -             | -               | -       | -              | -               | -       | -              | -               | -       | -              | -              | -       |
| 2 or less job changes (per 10 years in paid work)         | -0.020         | (-0.039,0.000)  | 0.053   | -0.014         | (-0.034,0.006)  | 0.184   | 0.015               | (-0.010,0.039)  | 0.244   | 0.024          | (0.009,0.038)   | 0.002   | 0.009         | (-0.014,0.032)  | 0.455   | 0.041             | (0.023,0.059)   | <0.001  | 0.045         | (0.023,0.067)   | <0.001  | 0.008          | (-0.013,0.028)  | 0.472   | 0.018          | (0.002,0.034)   | 0.030   | -0.003         | (-0.023,0.017) | 0.772   |
| more than 2 job changes (per 10 years in paid work)       | -0.052         | (-0.084,-0.020) | 0.001   | -0.038         | (-0.071,-0.006) | 0.021   | -0.060              | (-0.100,-0.020) | 0.003   | 0.056          | (0.033,0.080)   | <0.001  | 0.003         | (-0.034,0.041)  | 0.864   | 0.063             | (0.034,0.092)   | <0.001  | 0.094         | (0.059,0.129)   | <0.001  | -0.050         | (-0.083,-0.017) | 0.003   | 0.031          | (0.005,0.057)   | 0.019   | 0.047          | (0.015,0.080)  | 0.005   |
| No unemployment period (ref.)                             | -              | -               | -       | -              | -               | -       | -                   | -               | -       | -              | -               | -       | -             | -               | -       | -                 | -               | -       | -             | -               | -       | -              | -               | -       | -              | -               | -       | -              | -              | -       |
| 1 unemployment period                                     | -0.008         | (-0.040,0.024)  | 0.632   | -0.022         | (-0.055,0.011)  | 0.190   | -0.044              | (-0.084,-0.004) | 0.030   | 0.045          | (0.022,0.069)   | <0.001  | 0.040         | (0.002,0.077)   | 0.040   | 0.035             | (0.006,0.065)   | 0.019   | 0.057         | (0.022,0.092)   | 0.002   | -0.038         | (-0.071,-0.004) | 0.027   | 0.039          | (0.013,0.065)   | 0.004   | 0.051          | (0.018,0.084)  | 0.003   |
| 2+ unemployment periods                                   | -0.052         | (-0.115,0.012)  | 0.110   | -0.024         | (-0.089,0.041)  | 0.464   | -0.167              | (-0.247,-0.087) | <0.001  | 0.069          | (0.022,0.116)   | 0.004   | -0.023        | (-0.098,0.052)  | 0.546   | 0.070             | (0.011,0.128)   | 0.019   | 0.135         | (0.065,0.204)   | <0.001  | -0.068         | (-0.134,-0.002) | 0.044   | 0.064          | (0.012,0.115)   | 0.016   | 0.154          | (0.089,0.220)  | <0.001  |
| No years out of work (ref.)                               | -              | -               | -       | -              | -               | -       | -                   | -               | -       | -              | -               | -       | -             | -               | -       | -                 | -               | -       | -             | -               | -       | -              | -               | -       | -              | -               | -       | -              | -              | -       |
| 1-5 years out of work                                     | -0.041         | (-0.063,-0.020) | <0.001  | -0.034         | (-0.057,-0.012) | 0.002   | -0.027              | (-0.055,-0.001) | 0.047   | 0.036          | (-0.001,0.032)  | 0.052   | 0.020         | (-0.005,0.046)  | 0.119   | 0.026             | (0.006,0.046)   | 0.009   | 0.033         | (0.009,0.056)   | 0.007   | -0.012         | (-0.035,0.011)  | 0.294   | 0.017          | (-0.001,0.035)  | 0.054   | 0.036          | (0.014,0.059)  | 0.001   |
| 6+ years out of work                                      | 0.002          | (-0.030,0.034)  | 0.907   | 0.016          | (-0.017,0.049)  | 0.351   | -0.083              | (-0.124,-0.042) | <0.001  | 0.064          | (0.040,0.088)   | <0.001  | 0.059         | (0.021,0.097)   | 0.002   | 0.071             | (0.041,0.101)   | <0.001  | 0.085         | (0.050,0.121)   | <0.001  | -0.063         | (-0.099,-0.031) | <0.001  | 0.049          | (0.023,0.075)   | <0.001  | 0.098          | (0.065,0.132)  | <0.001  |
| Large employers, higher managers and professionals (ref.) | -              | -               | -       | -              | -               | -       | -                   | -               | -       | -              | -               | -       | -             | -               | -       | -                 | -               | -       | -             | -               | -       | -              | -               | -       | -              | -               | -       | -              | -              | -       |
| Lower managers and professionals                          | 0.023          | (0.007,0.052)   | 0.128   | 0.008          | (-0.022,0.038)  | 0.601   | -0.003              | (-0.039,0.034)  | 0.875   | 0.010          | (-0.012,0.032)  | 0.360   | -0.016        | (-0.051,0.018)  | 0.356   | -0.001            | (-0.028,0.026)  | 0.947   | -0.005        | (-0.037,0.027)  | 0.779   | 0.010          | (-0.020,0.041)  | 0.509   | -0.008         | (-0.032,0.016)  | 0.525   | 0.012          | (-0.018,0.043) | 0.428   |
| Intermediate employee                                     | 0.076          | (0.043,0.109)   | <0.001  | 0.065          | (0.031,0.099)   | <0.001  | 0.017               | (-0.024,0.058)  | 0.419   | 0.052          | (0.028,0.077)   | <0.001  | 0.049         | (0.010,0.088)   | 0.013   | 0.023             | (-0.007,0.053)  | 0.138   | 0.049         | (0.013,0.085)   | 0.008   | 0.017          | (-0.018,0.051)  | 0.336   | 0.022          | (-0.005,0.049)  | 0.108   | 0.038          | (0.004,0.072)  | 0.031   |
| Small employers and self-employed                         | 0.142          | (0.081,0.203)   | <0.001  | 0.128          | (0.065,0.190)   | <0.001  | -0.046              | (-0.123,0.031)  | 0.240   | 0.199          | (0.154,0.244)   | <0.001  | 0.171         | (0.099,0.242)   | <0.001  | 0.095             | (0.039,0.150)   | 0.001   | 0.099         | (0.032,0.166)   | 0.004   | 0.014          | (-0.050,0.078)  | 0.664   | 0.211          | (0.161,0.260)   | <0.001  | 0.105          | (0.042,0.168)  | 0.001   |
| Lower grade white collar workers                          | 0.091          | (0.030,0.152)   | 0.004   | 0.069          | (0.007,0.132)   | 0.029   | -0.033              | (-0.110,0.045)  | 0.408   | 0.125          | (0.080,0.170)   | <0.001  | 0.127         | (0.055,0.198)   | 0.001   | 0.054             | (-0.002,0.100)  | 0.057   | 0.124         | (0.057,0.190)   | <0.001  | -0.033         | (-0.096,0.031)  | 0.312   | 0.069          | (0.019,0.118)   | 0.006   | 0.052          | (-0.010,0.115) | 0.101   |
| Skilled workers                                           | 0.113          | (0.075,0.150)   | <0.001  | 0.096          | (0.058,0.135)   | <0.001  | 0.008               | (-0.038,0.055)  | 0.724   | 0.112          | (0.085,0.140)   | <0.001  | 0.119         | (0.075,0.163)   | <0.001  | 0.056             | (0.022,0.090)   | 0.001   | 0.045         | (0.004,0.086)   | 0.031   | 0.047          | (0.007,0.086)   | 0.020   | 0.059          | (0.028,0.089)   | <0.001  | 0.032          | (-0.007,0.071) | 0.110   |
| Semi- or unskilled workers                                | 0.142          | (0.098,0.186)   | <0.001  | 0.108          | (0.063,0.154)   | <0.001  | -0.062              | (-0.118,-0.007) | 0.027   | 0.179          | (0.146,0.211)   | <0.001  | 0.166         | (0.115,0.218)   | <0.001  | 0.073             | (0.032,0.113)   | <0.001  | 0.089         | (0.040,0.137)   | <0.001  | -0.004         | (-0.050,0.042)  | 0.854   | 0.127          | (0.091,0.163)   | <0.001  | 0.132          | (0.087,0.178)  | <0.001  |
| Main position unknown                                     | 0.069          | (0.039,0.099)   | <0.001  | 0.048          | (0.018,0.078)   | 0.002   | -0.021              | (-0.058,0.016)  | 0.265   | 0.078          | (0.056,0.100)   | <0.001  | 0.035         | (-0.001,0.070)  | 0.047   | 0.039             | (0.012,0.066)   | 0.005   | 0.056         | (0.023,0.088)   | 0.001   | 0.013          | (-0.018,0.044)  | 0.413   | 0.023          | (-0.001,0.047)  | 0.063   | 0.043          | (0.013,0.074)  | 0.005   |
| Promotion (ref.)                                          | -              | -               | -       | -              | -               | -       | -                   | -               | -       | -              | -               | -       | -             | -               | -       | -                 | -               | -       | -             | -               | -       | -              | -               | -       | -              | -               | -       | -              | -              | -       |
| No promotion                                              | 0.007          | (-0.015,0.029)  | 0.552   | -0.001         | (-0.023,0.022)  | 0.976   | -0.022              | (-0.049,0.005)  | 0.115   | -0.034         | (-0.051,-0.018) | <0.001  | -0.011        | (-0.037,0.015)  | 0.401   | -0.043            | (-0.063,-0.023) | <0.001  | -0.056        | (-0.080,-0.032) | <0.001  | -0.011         | (-0.034,0.012)  | 0.344   | -0.019         | (-0.037,-0.001) | 0.036   | -0.008         | (-0.031,0.014) | 0.464   |
| Failed promotion                                          | 0.041          | (-0.010,0.092)  | 0.117   | 0.038          | (-0.014,0.090)  | 0.149   | -0.136              | (-0.198,-0.073) | <0.001  | 0.055          | (0.017,0.093)   | 0.004   | -0.005        | (-0.064,0.055)  | 0.880   | 0.005             | (-0.042,0.051)  | 0.844   | -0.011        | (-0.066,0.045)  | 0.703   | 0.020          | (-0.032,0.073)  | 0.448   | 0.035          | (-0.006,0.077)  | 0.093   | 0.048          | (-0.004,0.100) | 0.073   |

Note. Models are based on linear multilevel models (individuals nested in health examination center) and calculated separately for each career characteristic, adjusted for age, age square, partnership situation and education (complete case analyses). Respondents who retired or had a health-related career interruption prior age 45 are excluded from the analyses. Each outcome was log-transformed in case of skewness (i.e. white blood cell counts, blood sugar levels, ratio of total to HDL cholesterol, triglycerides, and lung function) and standardized to enable comparisons before estimating models. Coefficients estimate the differences on the standardized scale to the reference category. The sample varies according to the outcome, because valid data for some medical examination data (i.e. lung function) is available for a lower proportion of participants than data from blood samples.

SBP: Systolic blood pressure, DBP: Diastolic blood pressure, FEV1/FVC: Ratio of FEV to FVC, WHR: Waist to hip ratio, FG: Fasting glucose, TC/HDL: Total cholesterol to HDL ratio, TG: Triglycerides, LDL: low density lipoproteins, CCR: Creatinine clearance Rate, WBC: White blood cells counts.

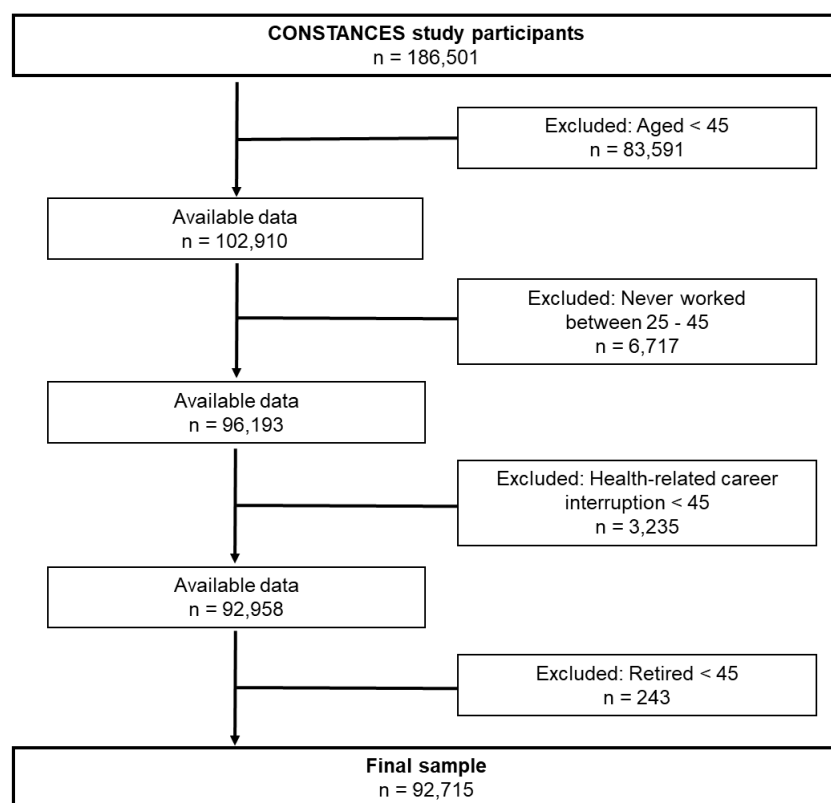

Figure S1: Final Sample Flow Chart.

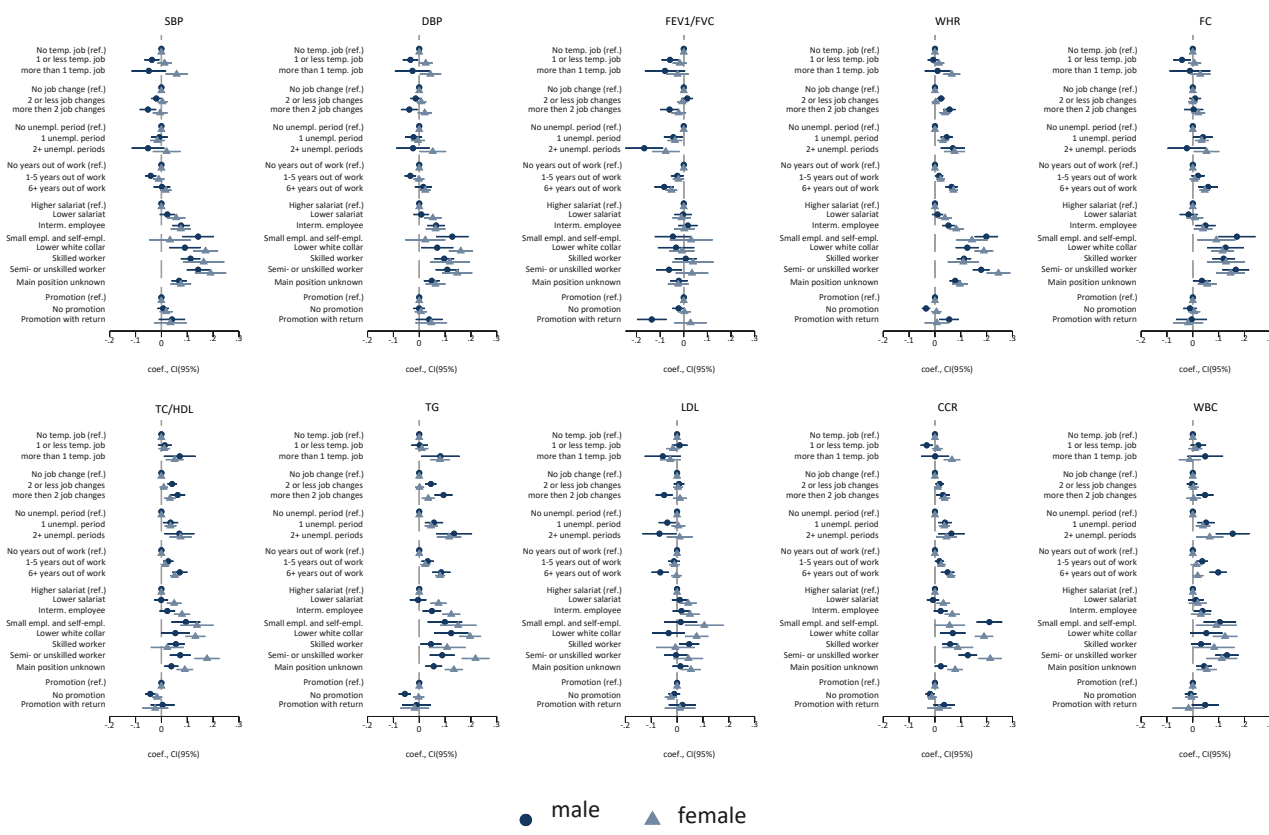

Note. Models are based on linear multilevel models (individuals nested in health examination center) and calculated separately for each career characteristic, adjusted for age, age square, partnership situation and education (complete case analyses). Respondents who retired or had a health-related career interruption prior age 45 are excluded from the analyses. Each outcome was log-transformed in case of skewness (i.e. white blood cell counts, blood sugar levels, ratio of total to HDL cholesterol, triglycerides, and lung function) and standardized to enable comparisons before estimating models. Coefficients estimate the differences on the standardized scale to the reference category.

SBP: Systolic blood pressure, DBP: Diastolic blood pressure, FEV1/FVC: Ratio of FEV to FVC, WHR: Waist to hip ratio, FG: Fasting glucose, TC/ HDL: Total cholesterol to HDL ratio, TG: Triglycerides, LDL: low density lipoproteins, CCR: Creatinine clearance Rate, WBC: White blood cells counts.

Figure S2: Association between career characteristics and allostatic load biomarkers for men and women unstandardized regression coefficients (b) and confidence intervals
